# Supplementary material for: Quantification of anticipation of excitement with three-axial model of emotion with EEG
Source: bioRxiv or medRxiv preprint supplement (doi:10.1101/659979), 2019-11-29
Supplement: Supplementary file [file media-1.pdf]

## Supplementary Table

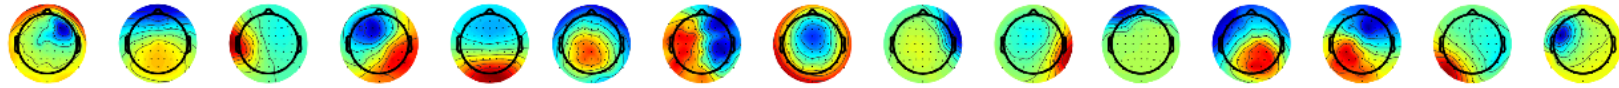

|                                                                     | Cls. 1            | Cls. 2            | Cls. 3            | Cls. 4            | Cls. 5             | Cls. 6            | Cls. 7            | Cls. 8            | Cls. 9             | Cls. 10            | Cls. 11           | Cls. 12            | Cls. 13           | Cls. 14           | Cls. 15           |  |
|---------------------------------------------------------------------|-------------------|-------------------|-------------------|-------------------|--------------------|-------------------|-------------------|-------------------|--------------------|--------------------|-------------------|--------------------|-------------------|-------------------|-------------------|--|
| # participants                                                      | 26 (93%)          | 28 (100%)         | 24 (86%)          | 25 (89%)          | 28 (100%)          | 26 (93%)          | 24 (86%)          | 23 (82%)          | 25 (89%)           | 25 (89%)           | 22 (79%)          | 28 (100%)          | 25 (89%)          | 26 (93%)          | 24 (86%)          |  |
| # total ICs                                                         | 43                | 66                | 59                | 75                | 117                | 62                | 52                | 79                | 51                 | 44                 | 41                | 66                 | 78                | 66                | 50                |  |
| <b>Valence (pleasant v.s. unpleasant)</b>                           |                   |                   |                   |                   |                    |                   |                   |                   |                    |                    |                   |                    |                   |                   |                   |  |
| $\theta$                                                            | <b>2.08 (.11)</b> | 0.99 (.55)        | -0.88 (.54)       | 0.32 (.83)        | <u>1.77 (.23)</u>  | <b>2.63 (.02)</b> | <b>1.99 (.06)</b> | 0.70 (.48)        | -1.01 (.31)        | -0.01 (.99)        | <b>2.56 (.03)</b> | 0.73 (.69)         | 0.65 (.77)        | -1.34 (.26)       | 0.77 (.44)        |  |
| $\alpha$                                                            | <u>1.70 (.13)</u> | 0.90 (.55)        | -1.17 (.54)       | -1.07 (.83)       | -0.07 (.94)        | -0.09 (.92)       | 0.97 (.33)        | 0.70 (.48)        | <u>-1.69 (.17)</u> | 0.15 (.99)         | 1.15 (.37)        | 0.83 (.69)         | -0.28 (.78)       | -0.16 (.87)       | 0.89 (.44)        |  |
| $\beta$                                                             | 0.75 (.45)        | 0.23 (.81)        | 0.60 (.54)        | -0.21 (.83)       | 0.96 (.50)         | 1.57 (.17)        | <b>2.36 (.05)</b> | 1.46 (.43)        | -1.57 (.17)        | 1.21 (.67)         | 0.58 (.56)        | -0.34 (.73)        | <u>1.71 (.26)</u> | 1.36 (.26)        | -1.12 (.44)       |  |
| <b>Arousal (high v.s. low)</b>                                      |                   |                   |                   |                   |                    |                   |                   |                   |                    |                    |                   |                    |                   |                   |                   |  |
| $\theta$                                                            | 0.31 (.75)        | <u>1.70 (.13)</u> | 0.88 (.56)        | 1.40 (.16)        | <b>3.48 (.00)</b>  | -1.24 (.31)       | 1.57 (.17)        | <b>2.14 (.03)</b> | 0.97 (.32)         | 1.04 (.37)         | -0.64 (.53)       | <b>-2.05 (.11)</b> | -0.64 (.78)       | <b>3.03 (.00)</b> | 0.00 (.99)        |  |
| $\alpha$                                                            | 0.34 (.75)        | <b>3.64 (.00)</b> | <b>2.63 (.02)</b> | <b>3.60 (.00)</b> | <b>5.69 (.00)</b>  | 1.55 (.31)        | <b>3.72 (.00)</b> | <b>3.84 (.00)</b> | 2.46 (.04)         | <u>1.74 (.24)</u>  | 0.62 (.53)        | 0.71 (.71)         | 1.32 (.55)        | <b>3.91 (.00)</b> | 0.77 (.99)        |  |
| $\beta$                                                             | 0.52 (.75)        | 0.66 (.50)        | -0.34 (.73)       | <u>1.74 (.12)</u> | <b>2.08 (.03)</b>  | 0.44 (.66)        | 0.96 (.33)        | <b>2.50 (.01)</b> | 1.37 (.25)         | -0.89 (.37)        | 1.52 (.38)        | -0.21 (.83)        | 0.06 (.95)        | 0.76 (.44)        | 0.28 (.99)        |  |
| <b>Expectation (predicting pleasant v.s. predicting unpleasant)</b> |                   |                   |                   |                   |                    |                   |                   |                   |                    |                    |                   |                    |                   |                   |                   |  |
| $\theta$                                                            | 0.94 (.34)        | -1.63 (.31)       | -0.57 (.84)       | -0.58 (.60)       | -1.03 (.30)        | -0.39 (.81)       | 0.44 (.81)        | 0.08 (.93)        | -0.87 (.43)        | <b>-2.42 (.04)</b> | -0.46 (.96)       | 0.05 (.96)         | 1.11 (.49)        | 0.69 (.73)        | -0.20 (.84)       |  |
| $\alpha$                                                            | 1.26 (.31)        | -0.92 (.53)       | -0.60 (.84)       | -0.52 (.60)       | -1.28 (.30)        | -1.00 (.81)       | 0.95 (.81)        | -0.67 (.75)       | 0.79 (.43)         | -1.26 (.26)        | -0.03 (.97)       | -1.40 (.24)        | -0.98 (.49)       | 0.18 (.86)        | <u>1.77 (.22)</u> |  |
| $\beta$                                                             | 1.41 (.31)        | 0.21 (.83)        | -0.04 (.96)       | -0.99 (.60)       | <b>-1.92 (.16)</b> | -0.23 (.81)       | 0.23 (.81)        | 0.80 (.75)        | <b>1.99 (.14)</b>  | 1.12 (.26)         | 0.72 (.96)        | <b>-2.15 (.09)</b> | 0.08 (.93)        | 0.78 (.73)        | -0.25 (.84)       |  |

Summary of clustered ICs. Number of participants and percentage of participants among all who held an IC clustered into each IC cluster (“Cls. 1” to “Cls. 15”). All statistical results ( $Z$ -scores and FDR corrected  $p$ -values in parentheses) of Wilcoxon signed rank test on each frequency range for all comparisons of interest. **Red texts** represent robustly significant frequency at  $p_{\text{FDR-corrected}} < .05$ ; **bold texts** represent significant frequency at  $p_{\text{uncorrected}} < .05$ ; and **underlined texts** represent marginally significant frequency at  $p_{\text{uncorrected}} < .10$ . As was obvious, different IC and frequency ranges reflected different aspects of psychological axis, valence, arousal, and expectation. However, some ICs appeared to overlap among different axes (i.e.,  $\theta$  of IC Cluster 5 for valence and arousal, and  $\beta$  of that for arousal and expectation). In addition, three IC clusters out of fifteen appeared to be shared by all (100%) participants, suggesting such IC may be applicable for anyone; however, some IC clusters was not shared by all (i.e. IC cluster 11 for valence and IC cluster 10 were shared by only 79% and 89%, respectively).

### Supplementary Figure 1

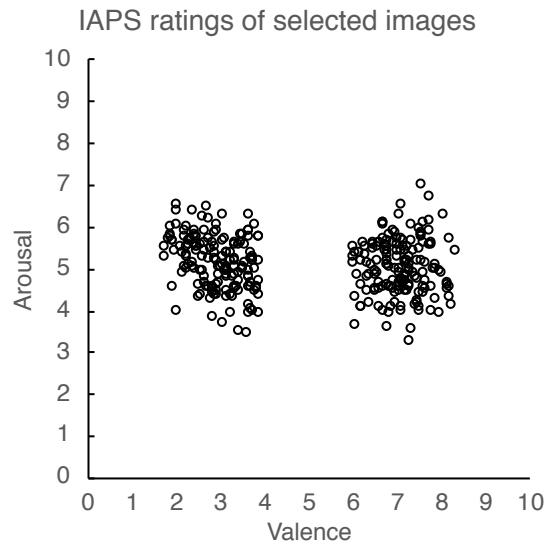

A scatter plot of subjective ratings (as reported in the Lang, Bradley, & Cuthbert, 2008) selected in this study for valence (along the X-axis) and arousal (along the Y-axis). Pictures with intermediate valence (with valence rating between 4–6) were not used in this study. As is apparent in the figure below, we selected pictures so that the valence cue would be congruent to its assignment: one for pleasant (valence value above 6) and the other for unpleasant (valence value below 4). As for *arousal*, we did not set such a border, yet simply applied a median split for high and low arousal pictures. See Supplementary Table 2 below for the details (mean  $\pm$  *SD*) of valence and arousal ratings for selected sets of pictures.

Supplementary Table 2

|         |            | Set 1           | Set 2           |
|---------|------------|-----------------|-----------------|
| Valence | Pleasant   | 7.17 $\pm$ 0.53 | 6.99 $\pm$ 0.57 |
|         | Unpleasant | 3.06 $\pm$ 0.61 | 2.91 $\pm$ 0.55 |
| Arousal | High       | 5.31 $\pm$ 0.45 | 5.77 $\pm$ 0.28 |
|         | Low        | 4.41 $\pm$ 0.27 | 4.86 $\pm$ 0.52 |

## Supplementary Figure 2

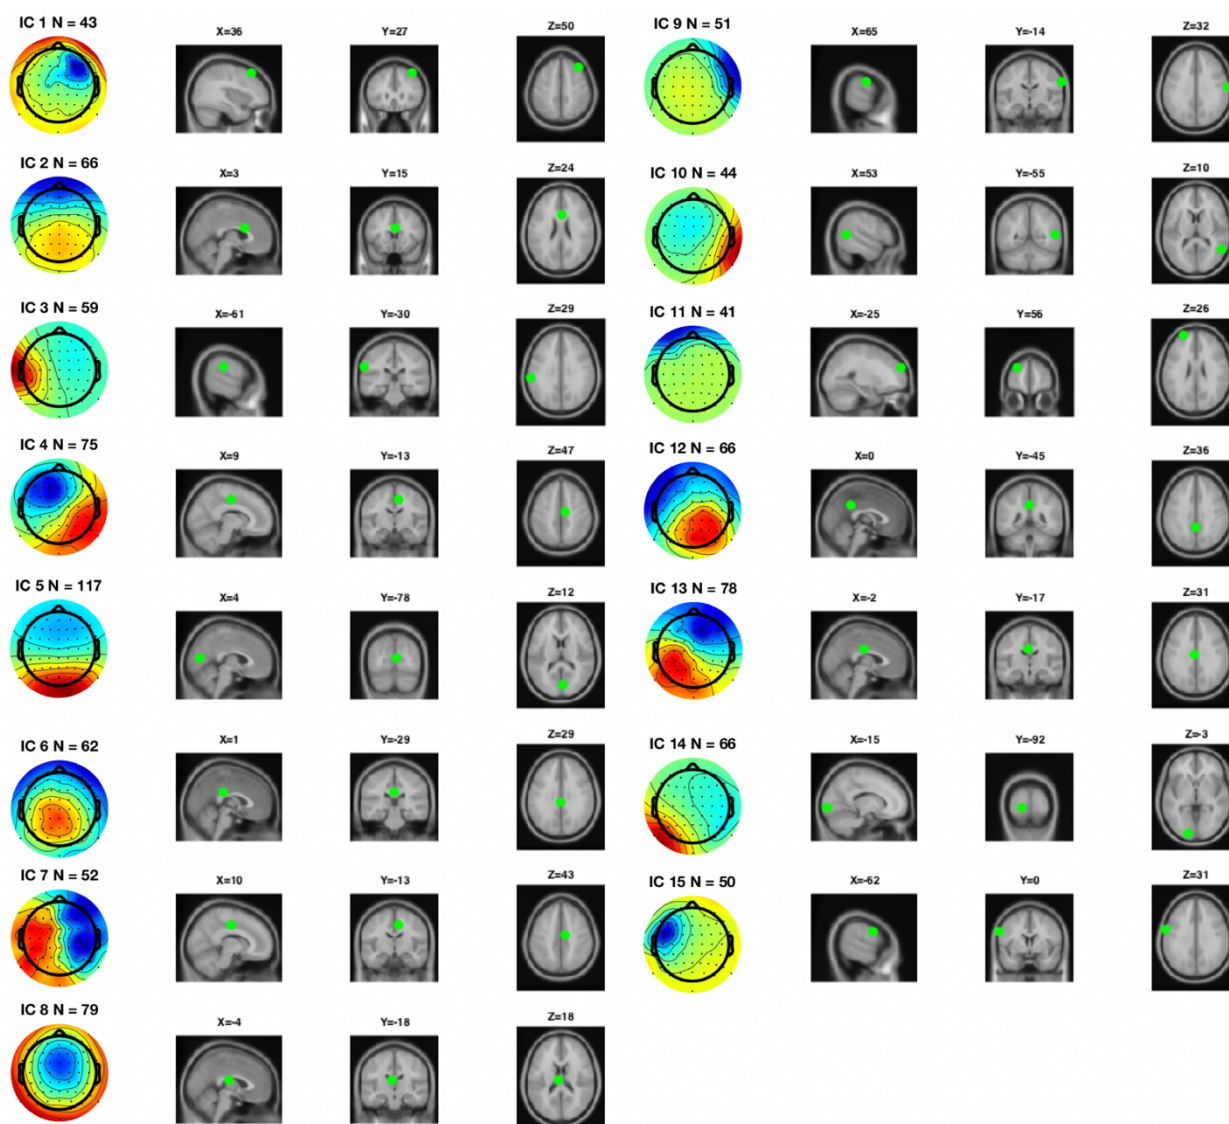

Scalp topography of each IC cluster with a number of ICs in the cluster and a location of the centroid (green dot) plotted on a template brain for each IC cluster with its spherical coordinates. Centroids for IC6, 5, and 10 (selected for valence, arousal, and expectation) were centered around middle-posterior cingulate cortex, visual cortex in proximity to posterior cingulate and precuneus regions, and right angular gyrus (lateral occipital complex) regions, respectively.

**Appendix: 320 IAPS picture codes acquired from the IAPS database**

|        |        |        |      |      |      |      |      |
|--------|--------|--------|------|------|------|------|------|
| 1090   | 2075   | 2387   | 4007 | 5628 | 7481 | 9001 | 9390 |
| 1111   | 2091   | 2389   | 4090 | 5820 | 7482 | 9002 | 9403 |
| 1113   | 2095   | 2395   | 4150 | 5829 | 7489 | 9008 | 9404 |
| 1220   | 2100   | 2398   | 4225 | 5830 | 7492 | 9031 | 9409 |
| 1270   | 2110   | 2399   | 4250 | 5831 | 7499 | 9041 | 9417 |
| 1270   | 2115   | 2455   | 4255 | 5833 | 7502 | 9043 | 9421 |
| 1271   | 2120   | 2456   | 4532 | 5910 | 7521 | 9046 | 9425 |
| 1274   | 2141   | 2457   | 4597 | 5961 | 7530 | 9050 | 9426 |
| 1275   | 2150   | 2530   | 4598 | 5973 | 7660 | 9090 | 9427 |
| 1280   | 2152   | 2590   | 4599 | 5994 | 8001 | 9102 | 9428 |
| 1301   | 2153   | 2655   | 4600 | 6240 | 8021 | 9110 | 9429 |
| 1340   | 2155   | 2661   | 4601 | 6242 | 8031 | 9140 | 9430 |
| 1410   | 2158   | 2683   | 4603 | 6244 | 8034 | 9145 | 9435 |
| 1440   | 2160   | 2694   | 4610 | 6311 | 8090 | 9180 | 9440 |
| 1441   | 2165   | 2700   | 4612 | 6530 | 8130 | 9182 | 9445 |
| 1460   | 2170   | 2703   | 4614 | 6561 | 8161 | 9184 | 9470 |
| 1463   | 2205   | 2715   | 4617 | 6831 | 8162 | 9185 | 9471 |
| 1540   | 2208   | 2716   | 4619 | 6838 | 8163 | 9186 | 9490 |
| 1590   | 2209   | 2722   | 4621 | 7079 | 8190 | 9190 | 9491 |
| 1601   | 2216   | 2745.2 | 4622 | 7135 | 8193 | 9220 | 9495 |
| 1620   | 2217   | 2750   | 4623 | 7200 | 8208 | 9230 | 9530 |
| 1630   | 2222   | 2753   | 4624 | 7240 | 8210 | 9265 | 9560 |
| 1659   | 2224   | 2795   | 4626 | 7250 | 8230 | 9270 | 9561 |
| 1710   | 2274   | 2799   | 4628 | 7260 | 8231 | 9280 | 9571 |
| 1720   | 2276   | 2800   | 4640 | 7279 | 8330 | 9290 | 9592 |
| 1721   | 2278   | 2900.1 | 4641 | 7280 | 8340 | 9291 | 9594 |
| 1750   | 2300   | 2900.2 | 4645 | 7284 | 8370 | 9295 | 9610 |
| 1810   | 2301   | 3022   | 4700 | 7286 | 8380 | 9300 | 9622 |
| 1812   | 2303   | 3180   | 5199 | 7330 | 8420 | 9301 | 9630 |
| 1920   | 2306   | 3181   | 5215 | 7350 | 8461 | 9302 | 9800 |
| 2019   | 2311   | 3185   | 5250 | 7352 | 8467 | 9320 | 9831 |
| 2030   | 2312   | 3195   | 5270 | 7359 | 8470 | 9322 | 9900 |
| 2039   | 2314   | 3215   | 5450 | 7360 | 8480 | 9325 | 9903 |
| 2040   | 2340   | 3216   | 5470 | 7361 | 8485 | 9326 | 9912 |
| 2050   | 2345   | 3220   | 5480 | 7380 | 8496 | 9330 | 9920 |
| 2055.1 | 2345.1 | 3230   | 5551 | 7390 | 8499 | 9331 | 9921 |
| 2057   | 2346   | 3280   | 5621 | 7430 | 8500 | 9332 | 9922 |
| 2058   | 2347   | 3300   | 5622 | 7470 | 8510 | 9341 | 9925 |
| 2070   | 2352.1 | 3350   | 5623 | 7477 | 8531 | 9342 | 9930 |
| 2071   | 2375.1 | 4006   | 5626 | 7480 | 8540 | 9373 | 9941 |
